# Supplementary material
Source: Springer Nature journal article supplement (https://www.springermedizin.de/resource/supplementary/12965_2011_94_MOESM5_ESM.pdf/9573092)

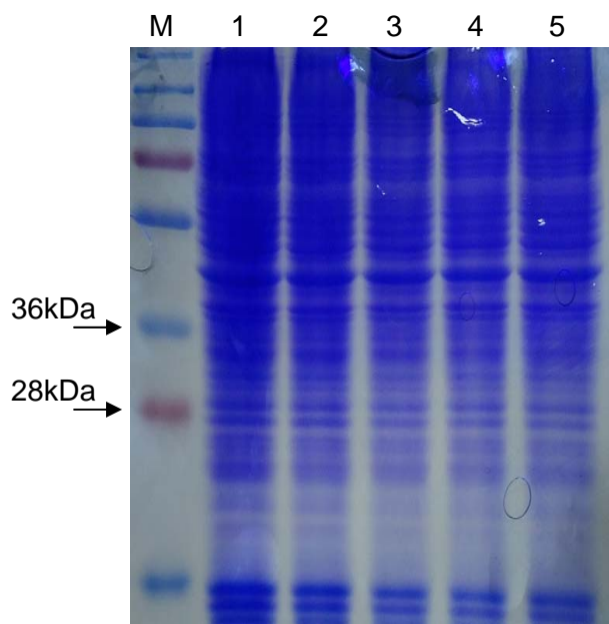

A

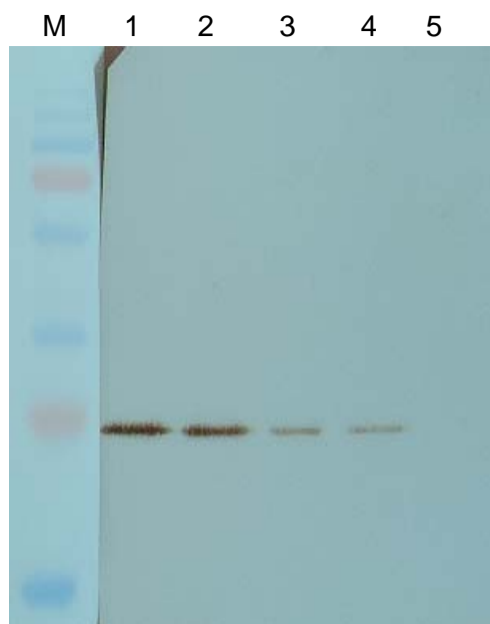

B

Supplement: MOESM5 [file 9573092]
